# Supplementary material for: Preclinical Efficacy of a Capsid Virus-like Particle-Based Vaccine Targeting IL-1β for Treatment of Allergic Contact Dermatitis
Source: MDPI journal article supplement (doi:10.3390/vaccines10050828), 2022-05-23
Supplement: s1 [file s1]

## Supplementary figures

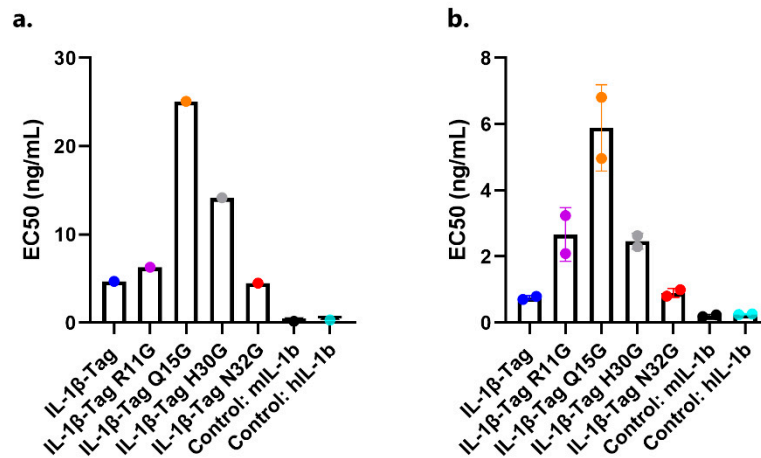

**Figure S1 IL-1 $\beta$  biological activity EC<sub>50</sub> values.** Two technical replicates of the HEK293 cell-based IL-1 $\beta$  activity assay. Dilution curves were fitted using [Agonist] vs. response – variable slope (four parameters) equation. EC<sub>50</sub> values were estimated from each fit.

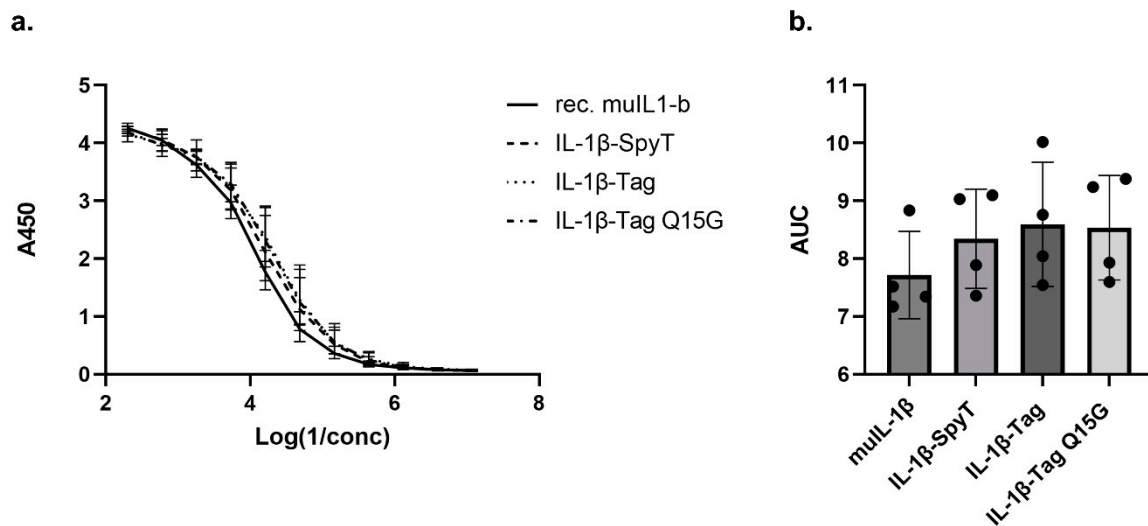

**Figure S2 Test of IL-1 $\beta$  coat proteins against serum from mice vaccinated with cVLP:IL-1 $\beta$  WT** The reactivity of serum from mice vaccinated with cVLP:IL-1 $\beta$  (7 $\mu$ g dose, W22) (n=4) was tested against recombinant mIL-1 $\beta$ , IL-1 $\beta$ -SpyT, IL-1 $\beta$ -Tag or IL-1 $\beta$ -Tag Q15G. **a.** Total IgG anti-IL-1 $\beta$  dilution curve with geometric mean  $\pm$  geometric SD. **b.** Anti-IL-1 $\beta$  total IgG titers depicted as AUC, with mean  $\pm$  SD. Statistical analysis was performed on log-transformed AUC values using one-way ANOVA, Tukeys multiple comparisons test (adjusted p-value < 0.05 was accepted as significant).

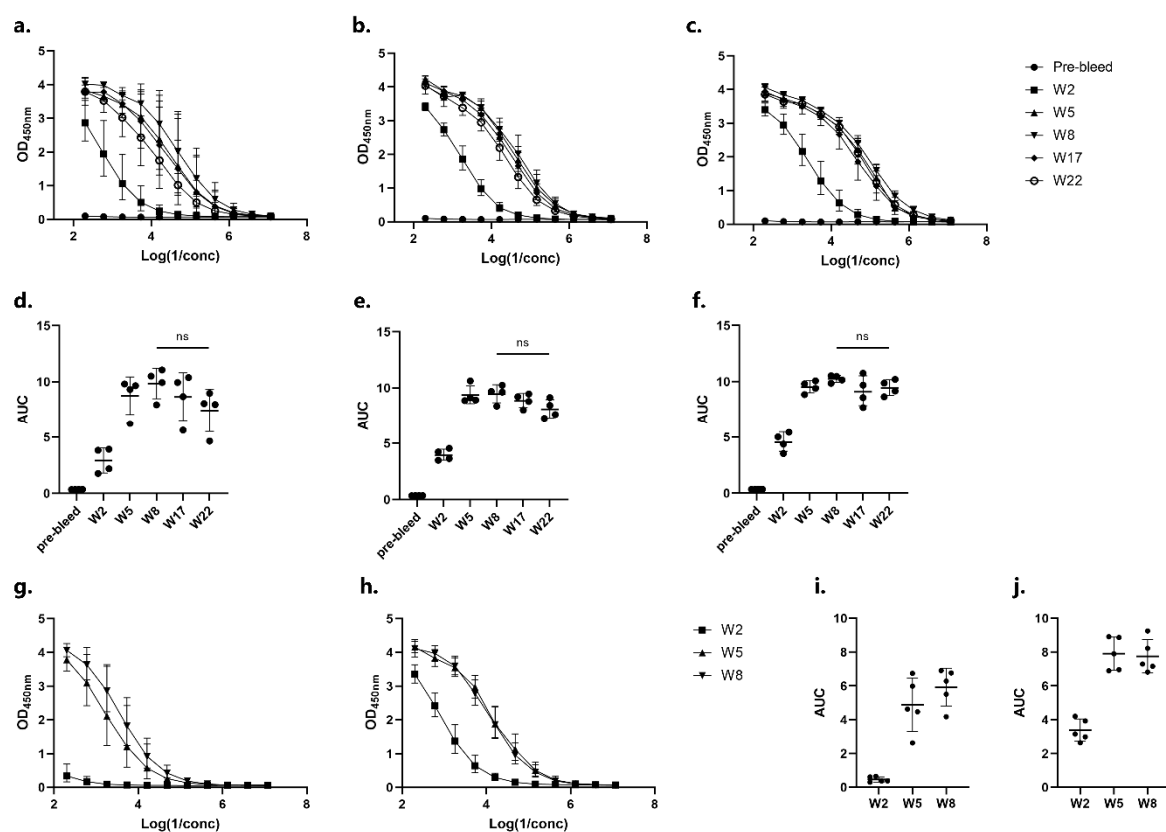

**Figure S3 Total IgG titers measured in serum from mice vaccinated with cVLP:IL-1 $\beta$  vaccines.** Serum samples were obtained from female C57BL/6 mice pre vaccination (pre-bleed) and two weeks after prime (W2), boost (W5) and second boost (W8), and additional blood samples at W17 and W22 for mice vaccinated with cVLP:IL-1 $\beta$  **a-c**. Total IgG anti-IL-1 $\beta$  dilution curve with geometric mean  $\pm$  geometric SD for mice vaccinated with cVLP:IL-1 $\beta$  dose of 2 $\mu$ g IL-1 $\beta$  (**a**), dose of 7 $\mu$ g IL-1 $\beta$  (**b**) or dose of 10 $\mu$ g IL-1 $\beta$  (**c**). **d-f**. Total IgG anti-IL-1 $\beta$  titers depicted as AUC with mean  $\pm$  SD from mice vaccinated with cVLP:IL-1 $\beta$  dose of 2 $\mu$ g IL-1 $\beta$  (**d**), dose of 7 $\mu$ g IL-1 $\beta$  (**e**) or dose of 10 $\mu$ g IL-1 $\beta$  (**f**). **g**. Total IgG anti-IL-1 $\beta$  dilution curve with geometric mean  $\pm$  geometric SD for mice vaccinated with cVLP:IL-1 $\beta$ . **h**. Total IgG anti-IL-1 $\beta$  dilution curve with geometric mean  $\pm$  geometric SD for mice vaccinated with cVLP:IL-1 $\beta$  Q15G. **i**. Total IgG anti-IL-1 $\beta$  titers depicted as AUC with mean  $\pm$  SD from mice vaccinated with cVLP:IL-1 $\beta$  **j**. Total IgG anti-IL-1 $\beta$  titers depicted as AUC with mean  $\pm$  SD from mice vaccinated with cVLP:IL-1 $\beta$  Q15G.

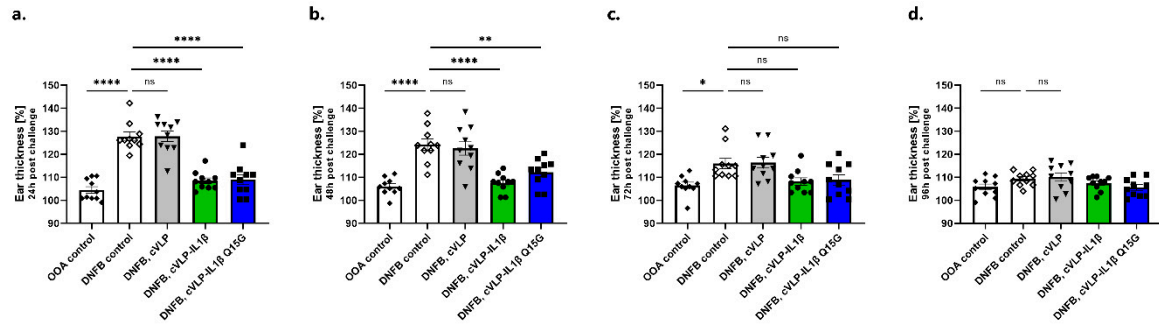

**Figure S4 Individual measurements of ear thickness post challenge of mice.** Ear thickness measured **a.** 24h, **b.** 48h, **c.** 72h and **d.** 96h post DNFB challenge, depicted as percentage (%) with mean  $\pm$  SEM. Graphs show data from two technical replicates (n=5). Statistical analysis was performed on log-transformed values using one-way ANOVA, Tukeys multiple comparisons test (adjusted p-value < 0.05 was accepted as significant).

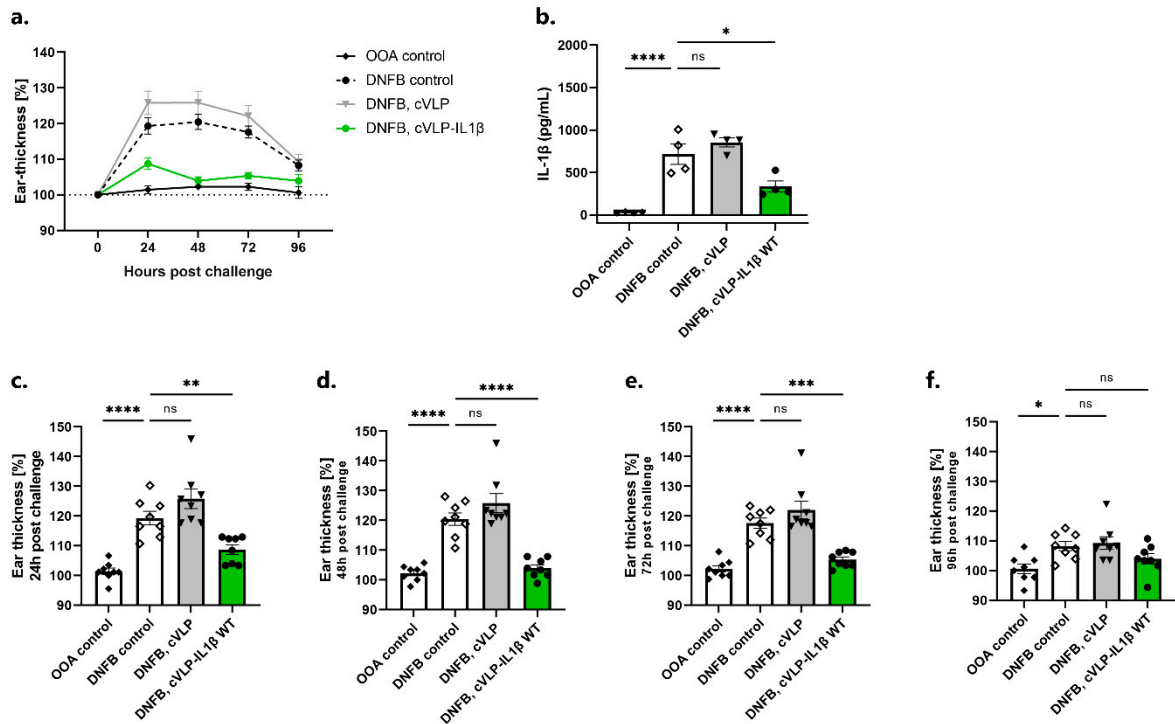

**Figure S5 Challenge study for mice vaccinated with another cVLP:IL-1 $\beta$  vaccine batch.** **a.** Ear thickness measured on groups of mice (n=8) 24h, 48h, 72h and 96h post challenge, depicted as percentage (%) with mean  $\pm$  SEM. **b.** IL-1 $\beta$  levels with mean  $\pm$  SEM measured in ears from groups of mice (n=4) sensitized and challenged with 1) OOA, 2) 0.15% DNFB, 3) 0.15% DNFB and vaccinated with unconjugated cVLP and 4) 0.15% DNFB and vaccinated with cVLP:IL-1 $\beta$  WT. **c-f.** Ear thickness measured 24h (**c**), 48h (**d**), 72h (**e**) and 96h (**f**) post DNFB challenge, depicted as percentage (%) with mean  $\pm$  SEM. Statistical analysis was performed on log-transformed values using one-way ANOVA, Tukeys multiple comparisons test (adjusted p-value < 0.05 was accepted as significant).

|                            |                                                                                                                                                          |
|----------------------------|----------------------------------------------------------------------------------------------------------------------------------------------------------|
| 3' <b>R11G</b> primer      | TTT CCA TGG GCC ATC ACC ATC ATC ATC ATG AAA ATC TGT ATT TTC AGG<br>GTG TTC CGA TTC GTC AGC TGC ATT ATC GTC TGG <b>GCG</b> ATG AAC AGC AGA<br>AAA GCC TGG |
| 5' PCR1 <b>Q15G</b> primer | CCA GGC TTT TGC CCT GTT CAT CAC GCA GAC GAT AAT GCA GC                                                                                                   |
| 3' PCR2 <b>Q15G</b> primer | ATG AAC AGG <b>GCA</b> AAA GCC TGG TTC TGA GCG ATC CGT ATG AAC T                                                                                         |
| 5' PCR1 <b>H30G</b> primer | CCA TTC AGG CCC AGT GCT TTC AGT TCA TAC GGA TCG CTC AG                                                                                                   |
| 3' PCR2 <b>H30G</b> primer | AAA GCA CTG <b>GGC</b> CTG AAT GGT CAG AAT ATT AAC CAG CAG GTC A                                                                                         |
| 5' PCR1 <b>N32G</b> primer | TAT TCT GAC CGC CCA GAT GCA GTG CTT TCA GTT CAT ACG GAT C                                                                                                |
| 3' PCR2 <b>N32G</b> primer | GCA TCT <b>GGG</b> <b>CGG</b> TCA GAA TAT TAA CCA GCA GGT CAT TTT CAG C                                                                                  |

**Table S1 Primers for introducing mutations into the muIL-1 $\beta$  gene sequence.**
